# Supplementary material for: Determining the Specificity of Cascade Binding, Interference, and Primed Adaptation In Vivo in the Escherichia coli Type I-E CRISPR-Cas System
Source: PubMed Central journal article supplement (PMC5904413; doi:10.1128/mbio.02100-17), 2018-04-17

# Figure S1

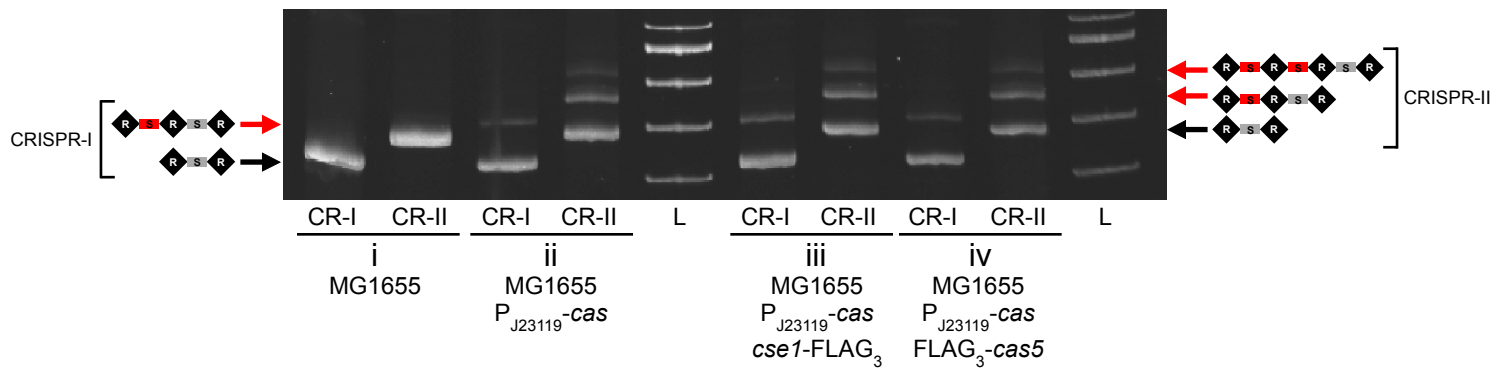

Supplement: mbo002183842sf1.pdf [file mbo002183842sf1.pdf]
